# Supplementary material
Source: PubMed Central journal article supplement (PMC3029230)
Supplement: NIHMS255580-supplement-1_si_001.pdf [file NIHMS255580-supplement-1_si_001.pdf]

## Supporting Materials

**Table S1.** The PDB entries, the descriptions of the complexes and the experimental binding free energies

| No. | PDB  | $\Delta G_{\text{exp}}$ | Descriptions                                         | References |
|-----|------|-------------------------|------------------------------------------------------|------------|
| a1  | 1D3D | -12.39                  | alpha-thrombin/benzo[B]thiophene inhibitor 4         | 1          |
| a2  | 1D3P | -10.08                  | alpha-thrombin/benzo[B]thiophene inhibitor 3         | 1          |
| a3  | 1D3Q | -8.92                   | alpha-thrombin/benzo[B]thiophene inhibitor 2         | 1          |
| a4  | 1D3T | -7.68                   | alpha-thrombin/benzo[B]thiophene inhibitor 1         | 1          |
| a5  | 1DWB | -3.98                   | alpha-thrombin/benzamidine                           | 2          |
| a6  | 1DWC | -10.6                   | alpha-thrombin/MD-805                                | 3          |
| a7  | 1DWD | -11.57                  | alpha-thrombin/napap                                 | 4          |
| b1  | 1AVD | -20.40                  | avidin/biotin                                        | 5          |
| b2  | ×    | -14.30                  | avidin/2'-iminobiotin                                | 5          |
| b3  | ×    | -14.00                  | avidin/desthiobiotin                                 | 5          |
| b4  | ×    | -8.80                   | avidin/1'-Nmethoxycarbonylbiotinmethyl ester         | 5          |
| b5  | ×    | -8.20                   | avidin/D-4-n-hexyl-2-iminoimidazolidine              | 5          |
| b6  | ×    | -5.00                   | avidin/D-4-n-hexyloxazolidone                        | 5          |
| b7  | ×    | -4.50                   | avidin/imidazolidone                                 | 5          |
| c1  | 1AC4 | -3.85                   | cytochrome C peroxidase/2,3,4-trimethyl-1,3-thiazole | 6          |
| c2  | 1AC8 | -4.78                   | cytochrome C peroxidase/3,4,5-trimethylthiazole      | 6          |
| c3  | 1AEB | -4.81                   | cytochrome C peroxidase/3-methylthiazole             | 6          |
| c4  | 1AED | -5.86                   | cytochrome C peroxidase/3,4-dimethylthiazole         | 6          |
| c5  | 1AEE | -3.96                   | cytochrome C peroxidase/aniline                      | 6          |
| c6  | 1AEF | -6.00                   | cytochrome C peroxidase/3-aminopyridine              | 6          |
| c7  | 1AEG | -5.99                   | cytochrome C peroxidase/4-aminopyridine              | 6          |
| c8  | 1AEH | -4.96                   | cytochrome C peroxidase/2-amino-4-methylthiazole     | 6          |
| c9  | 1AEJ | -5.21                   | cytochrome C peroxidase/1-vinylimidazole             | 6          |
| c10 | 1AEK | -4.92                   | cytochrome C peroxidase/indoline                     | 6          |
| c11 | 1AEM | -4.92                   | cytochrome C peroxidase/imidazo[1,2-A]pyridine       | 6          |
| c12 | 1AEN | -7.07                   | cytochrome C peroxidase/2-amino-5-methylthiazole     | 6          |
| c13 | 1AEO | -5.02                   | cytochrome C peroxidase/2-aminopyridine              | 6          |
| c14 | 1AEQ | -4.73                   | cytochrome C peroxidase/2-ethylimidazole             | 6          |
| c15 | 1AES | -4.33                   | cytochrome C peroxidase/imidazole                    | 6          |
| c16 | 1AET | -5.82                   | cytochrome C peroxidase/1-methylimidazole            | 6          |
| c17 | 1AEU | -5.94                   | cytochrome C peroxidase/2-methylimidazole            | 6          |
| c18 | 1AEV | -6.06                   | cytochrome C peroxidase/2-aminothiazole              | 6          |
| d1  | 1NSC | -4.09                   | neuraminidase/sialic acid                            | 7          |
| d2  | 1NSD | -7.23                   | neuraminidase/dana                                   | 8          |
| d3  | 2QWB | -3.74                   | mutated neuraminidase/sialic acid                    | 9          |
| d4  | 2QWC | -4.84                   | mutated neuraminidase/neu5ac2en                      | 9          |
| d5  | 2QWD | -6.61                   | mutated neuraminidase/4-amino-neu5ac2en              | 9          |

|    |      |        |                                                 |    |
|----|------|--------|-------------------------------------------------|----|
| d6 | 2QWE | -10.20 | mutated neuraminidase/4-guanidino-neu5ac2en     | 9  |
| d7 | 2QWF | -7.73  | mutated neuraminidase/g20                       | 9  |
| d8 | 2QWG | -11.45 | mutated neuraminidase/g28                       | 9  |
| e1 | 2CPP | -7.90  | P450cam/Camphor                                 | 10 |
| e2 | 6CPP | -5.91  | P450cam/Camphane                                | 10 |
| e3 | ×    | -6.54  | P450cam/Camphoroquinone                         | 10 |
| e4 | 7CPP | -5.57  | P450cam/Norcamphor                              | 10 |
| e5 | ×    | -5.52  | P450cam/ethylbenzene                            | 10 |
| e6 | ×    | -5.93  | P450cam/3,3,5,5-tetramethylcyclohexanone        | 10 |
| e7 | 8CPP | -7.53  | P450cam/thiocamphore                            | 10 |
| e8 | 4CPP | -5.90  | P450cam/Adamantine                              | 10 |
| e9 | 5CPP | -7.40  | P450cam/adamantanone                            | 10 |
| f1 | 1APT | -12.83 | penicillopepsin/pepstatin analogue              | 11 |
| f2 | 1APU | -10.51 | penicillopepsin/pepstatin analogue              | 11 |
| f3 | 1APV | -12.27 | penicillopepsin/iva-val-val(H)Dfo-n-methylamide | 12 |
| f4 | 1APW | -10.91 | penicillopepsin/iva-val-valDfo-n-methylamide    | 9  |
| f5 | 2WEA | -8.37  | penicillopepsin/pp6                             | 13 |
| f6 | 2WEB | -7.03  | penicillopepsin/pp4                             | 13 |
| f7 | 2WEC | -6.80  | penicillopepsin/pp5                             | 13 |

Table S2. The binding free energies for the  $\alpha$ -thrombin ligands based on two different solute dielectric constants ( $\epsilon_{in}= 1$  and  $\epsilon_{in}= 2$ ) calculated by MM/PBSA (kcal/mol)

| No.                | $\Delta E_{vdw}$               | $\Delta E_{ele}$   | $\Delta G_{PB}$   | $\Delta G_{SA}$  | $\Delta E_{ele}+\Delta G_{PB}$ | $\Delta E_{vdw}+\Delta G_{SA}$ | T $\Delta S$      | $\Delta G_{cal.}$ | $\Delta G_{exp.}$ |
|--------------------|--------------------------------|--------------------|-------------------|------------------|--------------------------------|--------------------------------|-------------------|-------------------|-------------------|
| $\epsilon_{in}= 1$ |                                |                    |                   |                  |                                |                                |                   |                   |                   |
| a1                 | -58.86 $\pm$ 1.09 <sup>a</sup> | -17.49 $\pm$ 0.98  | 57.19 $\pm$ 1.70  | -7.61 $\pm$ 0.17 | 39.71 $\pm$ 0.73               | -66.47 $\pm$ 1.27              | -22.81 $\pm$ 1.57 | -3.96 $\pm$ 1.03  | -12.39            |
| a2                 | -62.42 $\pm$ 1.69              | -14.56 $\pm$ 9.43  | 60.57 $\pm$ 7.55  | -7.65 $\pm$ 0.03 | 46.01 $\pm$ 1.88               | -70.06 $\pm$ 1.72              | 20.20 $\pm$ 3.01  | -3.85 $\pm$ 2.85  | -10.08            |
| a3                 | -52.69 $\pm$ 1.18              | -8.61 $\pm$ 1.06   | 49.43 $\pm$ 1.78  | -6.68 $\pm$ 0.24 | 40.82 $\pm$ 0.72               | -59.37 $\pm$ 1.42              | -20.01 $\pm$ 0.65 | 1.47 $\pm$ 1.36   | -8.92             |
| a4                 | -50.58 $\pm$ 2.58              | -1.85 $\pm$ 0.27   | 37.73 $\pm$ 0.54  | -6.42 $\pm$ 0.13 | 35.88 $\pm$ 0.27               | 57.00 $\pm$ 2.71               | -17.97 $\pm$ 1.06 | -3.16 $\pm$ 1.38  | -7.68             |
| a5                 | -18.73 $\pm$ 0.24              | -133.38 $\pm$ 1.13 | 193.46 $\pm$ 0.23 | -2.79 $\pm$ 0.00 | 60.08 $\pm$ 1.36               | -21.51 $\pm$ 0.24              | -15.50 $\pm$ 0.82 | 54.07 $\pm$ 0.79  | -3.98             |
| a6                 | -57.79 $\pm$ 0.46              | -72.31 $\pm$ 0.44  | 121.35 $\pm$ 0.61 | -7.11 $\pm$ 0.01 | 49.04 $\pm$ 0.17               | -64.89 $\pm$ 0.45              | -24.99 $\pm$ 1.73 | 9.14 $\pm$ 2.01   | -10.6             |
| a7                 | -58.27 $\pm$ 0.17              | -162.49 $\pm$ 0.25 | 249.30 $\pm$ 0.92 | -7.02 $\pm$ 0.04 | 86.81 $\pm$ 1.18               | -65.29 $\pm$ 0.13              | -22.53 $\pm$ 0.33 | 44.05 $\pm$ 0.98  | -11.57            |
| $\epsilon_{in}= 2$ |                                |                    |                   |                  |                                |                                |                   |                   |                   |
| a1                 | -58.86 $\pm$ 1.09 <sup>a</sup> | -8.74 $\pm$ 0.49   | 28.29 $\pm$ 0.70  | -7.61 $\pm$ 0.17 | 19.54 $\pm$ 0.22               | -66.47 $\pm$ 1.27              | -22.81 $\pm$ 1.57 | -24.12 $\pm$ 0.52 | -12.39            |
| a2                 | -62.42 $\pm$ 1.69              | -7.28 $\pm$ 4.71   | 29.74 $\pm$ 3.64  | -7.65 $\pm$ 0.03 | 22.46 $\pm$ 1.07               | -70.06 $\pm$ 1.72              | 20.20 $\pm$ 3.01  | -27.40 $\pm$ 3.65 | -10.08            |
| a3                 | -52.69 $\pm$ 1.18              | -4.30 $\pm$ 0.53   | 23.97 $\pm$ 0.88  | -6.68 $\pm$ 0.24 | 19.66 $\pm$ 0.35               | -59.37 $\pm$ 1.42              | -20.01 $\pm$ 0.65 | -19.69 $\pm$ 1.73 | -8.92             |
| a4                 | -50.58 $\pm$ 2.58              | -0.93 $\pm$ 0.13   | 18.23 $\pm$ 0.31  | -6.42 $\pm$ 0.13 | 17.31 $\pm$ 0.17               | 57.00 $\pm$ 2.71               | -17.97 $\pm$ 1.06 | -21.73 $\pm$ 1.47 | -7.68             |
| a5                 | -18.73 $\pm$ 0.24              | -66.69 $\pm$ 0.56  | 93.87 $\pm$ 0.16  | -2.79 $\pm$ 0.00 | 27.18 $\pm$ 0.72               | -21.51 $\pm$ 0.24              | -15.50 $\pm$ 0.82 | 21.16 $\pm$ 0.15  | -3.98             |
| a6                 | -57.79 $\pm$ 0.46              | -36.15 $\pm$ 0.22  | 59.07 $\pm$ 0.27  | -7.11 $\pm$ 0.01 | 22.92 $\pm$ 0.05               | -64.89 $\pm$ 0.45              | -24.99 $\pm$ 1.73 | -16.99 $\pm$ 2.13 | -10.6             |
| a7                 | -58.27 $\pm$ 0.17              | -81.24 $\pm$ 0.13  | 120.87 $\pm$ 0.44 | -7.02 $\pm$ 0.04 | 39.63 $\pm$ 0.57               | -65.29 $\pm$ 0.13              | -22.53 $\pm$ 0.33 | -3.14 $\pm$ 0.37  | -11.57            |

Table S3. The experimental and the predicted binding free energies and the corresponding energy terms calculated by MM/GBSA (kcal/mol)

| No.                                                    | $\Delta E_{\text{vdw}}$  | $\Delta E_{\text{ele}}$ | $\Delta G_{\text{GB}}$ | $\Delta G_{\text{SA}}$ | $\Delta E_{\text{ele}}+\Delta G_{\text{GB}}$ | $\Delta E_{\text{vdw}}+\Delta G_{\text{SA}}$ | TAS         | $\Delta G_{\text{cal.}}$ | $\Delta G_{\text{exp.}}$ |
|--------------------------------------------------------|--------------------------|-------------------------|------------------------|------------------------|----------------------------------------------|----------------------------------------------|-------------|--------------------------|--------------------------|
| $\alpha$ -thrombin ( $\epsilon_{\text{in}} = 4$ )      |                          |                         |                        |                        |                                              |                                              |             |                          |                          |
| a1                                                     | -58.86±1.09 <sup>a</sup> | -8.75±0.49              | 17.62±0.25             | -7.61±0.17             | 8.87±0.23                                    | -66.47±1.27                                  | -22.81±1.57 | -34.79±0.07              | -12.39                   |
| a2                                                     | -62.42±1.69              | -7.28±4.71              | 18.84±2.34             | -7.65±0.03             | 11.56±2.37                                   | -70.06±1.72                                  | 20.20±3.01  | -38.31±2.35              | -10.08                   |
| a3                                                     | -52.69±1.18              | -4.30±0.53              | 15.17±0.75             | -6.68±0.24             | 10.86±0.22                                   | -59.37±1.42                                  | -20.01±0.65 | -28.49±1.85              | -8.92                    |
| a4                                                     | -50.58±2.58              | -0.93±0.13              | 11.48±0.39             | -6.42±0.13             | 10.56±0.25                                   | 57.00±2.71                                   | -17.97±1.06 | -28.48±1.39              | -7.68                    |
| a5                                                     | -18.73±0.24              | -66.69±0.56             | 61.51±0.59             | -2.79±0.00             | 5.18±0.02                                    | -21.51±0.24                                  | -15.50±0.82 | -11.20±0.60              | -3.98                    |
| a6                                                     | -57.79±0.46              | -36.15±0.22             | 44.74±0.21             | -7.11±0.01             | 8.58±0.01                                    | -64.89±0.45                                  | -24.99±1.73 | -31.32±2.19              | -10.6                    |
| a7                                                     | -58.27±0.17              | -81.24±0.13             | 82.18±0.10             | -7.02±0.04             | 0.94±0.02                                    | -65.29±0.13                                  | -22.53±0.33 | -41.83±0.17              | -11.57                   |
| avidin ( $\epsilon_{\text{in}} = 1$ )                  |                          |                         |                        |                        |                                              |                                              |             |                          |                          |
| b1                                                     | -30.31±0.30              | -172.54±4.72            | 157.25±4.70            | -4.21±0.01             | -15.29±0.02                                  | -34.52±0.31                                  | -18.69±0.22 | -31.12±0.50              | -20.4                    |
| b2                                                     | -30.10±0.83              | -156.76±4.74            | 145.28±4.07            | -4.27±0.04             | -11.48±0.67                                  | -34.57±0.79                                  | -20.44±0.65 | -25.41±0.81              | -14.3                    |
| b3                                                     | -28.80±0.19              | -165.47±5.49            | 147.76±3.32            | -4.21±0.01             | -17.71±2.17                                  | -33.01±0.17                                  | -21.33±0.43 | -29.39±1.92              | -14.0                    |
| b4                                                     | -40.31±0.14              | -28.99±0.50             | 37.95±0.22             | -5.55±0.06             | 8.96±0.72                                    | -45.86±0.19                                  | -17.64±1.61 | -19.44±2.14              | -8.8                     |
| b5                                                     | -28.52±1.39              | -21.67±7.19             | 23.89±3.15             | -4.09±0.04             | 2.22±4.03                                    | -32.61±1.43                                  | -15.19±1.03 | -15.21±3.63              | -8.2                     |
| b6                                                     | -25.53±1.00              | -21.97±0.20             | 22.87±0.01             | -3.69±0.28             | 0.90±0.19                                    | -29.22±1.28                                  | -14.30±1.61 | -14.01±0.14              | -5.0                     |
| b7                                                     | -11.99±0.16              | -25.11±0.30             | 19.93±0.11             | -2.12±0.01             | -5.18±0.14                                   | -14.10±0.16                                  | -13.57±1.08 | -5.71±0.78               | -4.5                     |
| cytochrome C peroxidase ( $\epsilon_{\text{in}} = 1$ ) |                          |                         |                        |                        |                                              |                                              |             |                          |                          |
| c1                                                     | -25.60±0.02              | -352.29±0.21            | 354.69±0.20            | -2.81±0.01             | 2.40±0.01                                    | -28.41±0.03                                  | -15.50±0.09 | -10.51±0.06              | -3.85                    |
| c2                                                     | -25.84±0.06              | -354.14±0.11            | 354.21±0.08            | -2.79±0.02             | 0.06±0.03                                    | -28.63±0.04                                  | -16.87±1.10 | -11.69±1.10              | -4.78                    |
| c3                                                     | -17.90±0.91              | -361.70±3.03            | 361.23±2.79            | -1.93±0.43             | -0.47±0.24                                   | -19.82±1.34                                  | -14.53±0.06 | -5.76±1.16               | -4.81                    |
| c4                                                     | -22.28±0.15              | -353.88±1.88            | 353.41±1.97            | -2.62±0.00             | -0.47±0.10                                   | -24.90±0.16                                  | -15.05±1.02 | -10.31±0.96              | -5.86                    |
| c5                                                     | -18.07±0.07              | -365.62±6.40            | 362.08±4.85            | -2.47±0.02             | -3.54±1.55                                   | -20.53±0.05                                  | -13.19±1.28 | -10.88±2.88              | -3.96                    |
| c6                                                     | -17.74±0.48              | -377.44±0.95            | 372.47±0.56            | -2.86±0.44             | -4.97±0.39                                   | -20.60±0.05                                  | -15.63±0.03 | -9.94±0.41               | -6.00                    |
| c7                                                     | -17.94±0.12              | -372.64±3.54            | 369.19±3.19            | -2.40±0.01             | -3.45±0.35                                   | -20.34±0.12                                  | -15.73±0.04 | -8.06±0.50               | -5.99                    |
| c8                                                     | -21.33±0.03              | -360.68±2.15            | 359.78±2.11            | -2.49±0.00             | -0.90±0.04                                   | -23.83±0.03                                  | -15.50±0.40 | -9.23±0.47               | -4.96                    |
| c9                                                     | -17.09±0.41              | -372.32±1.53            | 367.54±1.25            | -2.44±0.00             | -4.77±0.28                                   | -19.52±0.41                                  | -15.44±0.14 | -8.86±0.01               | -5.21                    |
| c10                                                    | -20.72±0.31              | -372.36±0.79            | 366.06±1.03            | -3.29±0.43             | -6.30±0.24                                   | -24.01±0.74                                  | -15.45±2.08 | -14.86±1.11              | -4.92                    |
| c11                                                    | -21.89±0.08              | -363.77±3.15            | 358.94±3.22            | -2.64±0.01             | -4.84±0.08                                   | -24.53±0.06                                  | -14.50±0.33 | -14.86±0.19              | -4.92                    |

|                                         |             |              |             |            |             |             |             |             |        |
|-----------------------------------------|-------------|--------------|-------------|------------|-------------|-------------|-------------|-------------|--------|
| c12                                     | -18.40±0.08 | -379.84±2.79 | 366.23±3.09 | -2.48±0.00 | -13.61±0.30 | -20.88±0.08 | -14.39±0.48 | -20.10±0.69 | -7.07  |
| c13                                     | -16.64±0.04 | -381.35±2.81 | 367.75±2.68 | -2.78±0.4  | -13.61±0.13 | -19.42±0.46 | -13.81±0.31 | -19.22±0.02 | -5.02  |
| c14                                     | -19.34±0.12 | -366.62±1.23 | 362.71±1.06 | -2.62±0.0  | -3.91±0.17  | -21.96±0.12 | -15.22±0.93 | -10.64±0.88 | -4.73  |
| c15                                     | -11.42±0.03 | -372.89±0.16 | 366.57±0.51 | -2.42±0.4  | -6.32±0.35  | -13.84±0.42 | -12.09±0.29 | -8.07±1.05  | -4.33  |
| c16                                     | -15.83±0.06 | -375.74±2.87 | 369.63±2.73 | -2.26±0.0  | -6.10±0.14  | -18.09±0.06 | -15.19±0.04 | -9.00±0.16  | -5.82  |
| c17                                     | -16.35±0.00 | -370.52±1.42 | 365.21±1.33 | -2.34±0.0  | -5.31±0.09  | -18.69±0.01 | -14.95±0.68 | -9.05±0.77  | -5.94  |
| c18                                     | -15.64±0.13 | -369.60±2.73 | 363.27±1.55 | -2.35±0.0  | -6.33±1.18  | -17.98±0.14 | -16.93±0.07 | -7.38±0.96  | -6.06  |
| neuraminidase ( $\epsilon_{in} = 4$ )   |             |              |             |            |             |             |             |             |        |
| d1                                      | -22.63±0.30 | -29.30±0.41  | 23.53±0.13  | -3.99±0.3  | -5.77±0.54  | -26.61±0.08 | -21.97±1.02 | -10.41±0.56 | -4.09  |
| d2                                      | -22.95±0.57 | -33.69±1.21  | 27.53±0.89  | -4.65±0.0  | -6.16±0.31  | -27.60±0.59 | -15.78±2.65 | -17.97±2.93 | -7.23  |
| d3                                      | -21.19±0.17 | -26.07±0.54  | 22.73±0.49  | -4.45±0.0  | -3.34±1.02  | -25.64±0.17 | -21.54±0.07 | -7.43±0.78  | -3.74  |
| d4                                      | -21.84±0.52 | -22.36±0.17  | 20.43±0.30  | -4.64±0.0  | -1.93±0.13  | -26.49±0.53 | -20.75±2.30 | -7.67±2.96  | -4.84  |
| d5                                      | -20.12±0.64 | -23.62±0.04  | 21.98±1.10  | -4.58±0.0  | -1.64±1.06  | -24.71±0.68 | -19.03±0.08 | -7.31±1.66  | -6.61  |
| d6                                      | -28.40±0.03 | -22.53±3.39  | 20.18±2.05  | -4.99±0.0  | -2.35±1.33  | -33.39±0.05 | -19.29±1.83 | -16.45±3.11 | -10.2  |
| d7                                      | -27.83±0.38 | -3.53±0.35   | 7.02±0.37   | -4.98±1.1  | 3.69±0.02   | -32.81±1.55 | -22.86±2.01 | -6.26±0.48  | -7.73  |
| d8                                      | -29.43±0.01 | -13.36±0.42  | 14.97±0.53  | -4.49±0.4  | 1.42±0.95   | -33.92±0.46 | -17.72±2.16 | -14.77±2.65 | -11.45 |
| P450cam ( $\epsilon_{in} = 2$ )         |             |              |             |            |             |             |             |             |        |
| e1                                      | -27.57±0.61 | -4.55±0.13   | 5.37±0.06   | -2.78±0.5  | 0.82±0.07   | -30.35±0.03 | -15.25±0.85 | -14.29±0.75 | -7.90  |
| e2                                      | -26.94±0.28 | -0.07±0.02   | 1.16±0.05   | -3.33±0.0  | 1.09±0.03   | -30.27±0.25 | -16.63±0.62 | -12.55±0.34 | -5.91  |
| e3                                      | -29.03±0.24 | -4.30±0.06   | 6.86±0.19   | -3.38±0.0  | 2.57±0.13   | -31.41±0.24 | -14.45±1.76 | -15.39±1.39 | -6.54  |
| e4                                      | -20.35±0.05 | -0.93±0.05   | 3.61±0.12   | -2.79±0.0  | 2.69±0.07   | -23.14±0.03 | -15.04±0.27 | -5.41±0.31  | -5.57  |
| e5                                      | -21.13±0.24 | -0.12±0.04   | 3.89±0.03   | -2.37±0.5  | 3.78±0.07   | -23.50±0.78 | -14.40±0.32 | -5.32±0.39  | -5.52  |
| e6                                      | -27.68±0.36 | -4.51±1.17   | 5.00±0.57   | -3.56±0.0  | 0.49±0.60   | -31.25±0.35 | -15.31±0.54 | -15.44±0.30 | -5.93  |
| e7                                      | -29.42±0.10 | -2.61±0.08   | 4.21±0.04   | -3.48±0.0  | 2.05±0.04   | -32.89±0.10 | -13.24±0.42 | -17.61±0.28 | -7.53  |
| e8                                      | -26.36±0.04 | -0.01±0.0    | 1.95±0.01   | -2.60±0.5  | 1.94±0.01   | -28.96±0.51 | -13.99±0.56 | -13.03±0.04 | -5.90  |
| e9                                      | -28.09±0.11 | -1.44±0.04   | 4.54±0.03   | -3.15±0.0  | 3.10±0.01   | -31.23±0.10 | -15.10±0.60 | -13.03±0.71 | -7.40  |
| penicillopepsin ( $\epsilon_{in} = 2$ ) |             |              |             |            |             |             |             |             |        |
| f1                                      | -50.93±1.01 | -17.01±2.12  | 28.28±1.51  | -8.59±0.0  | 11.27±0.61  | -59.52±1.02 | -22.43±1.30 | -22.81±0.33 | -12.83 |
| f2                                      | -41.34±1.58 | -12.23±3.30  | 21.88±2.62  | -6.78±0.1  | 9.65±0.68   | -48.12±1.76 | -22.01±0.44 | -16.64±1.52 | -10.51 |
| f3                                      | -48.82±1.24 | -33.59±0.82  | 34.00±1.20  | -6.34±0.1  | 0.42±0.42   | -55.16±1.37 | -24.89±0.64 | -29.86±1.63 | -12.27 |

|    |                 |                 |                |                |            |             |                 |                 |        |
|----|-----------------|-----------------|----------------|----------------|------------|-------------|-----------------|-----------------|--------|
| f4 | -40.62±2.<br>30 | -13.06±3.<br>58 | 19.72±1.9<br>2 | -6.79±0.2<br>9 | 6.66±1.66  | -47.41±2.59 | -16.09±1.<br>52 | -24.65±5.<br>77 | -10.91 |
| f5 | -38.63±4.<br>78 | -7.32±0.6<br>2  | 16.34±1.5<br>5 | -5.48±0.8<br>5 | 9.02±0.93  | -44.10±5.63 | -20.06±0.<br>16 | -15.02±4.<br>86 | -8.37  |
| f6 | -42.23±4.<br>33 | -8.75±0.9<br>9  | 20.74±1.2<br>1 | -6.60±0.0<br>5 | 11.99±0.22 | -48.83±4.28 | -21.31±0.<br>23 | -15.53±3.<br>83 | -7.03  |
| f7 | -45.28±2.<br>23 | -15.07±2.<br>75 | 25.78±3.2<br>3 | -7.51±0.4<br>8 | 10.72±0.48 | -52.79±2.72 | -23.67±2.<br>29 | -18.41±0.<br>06 | -6.80  |

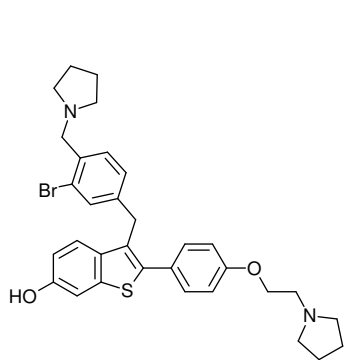

a1

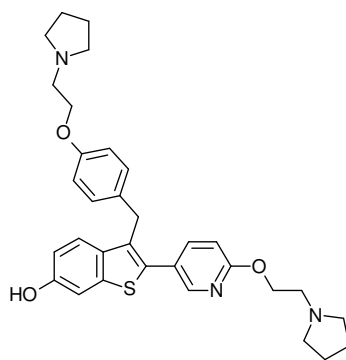

a2

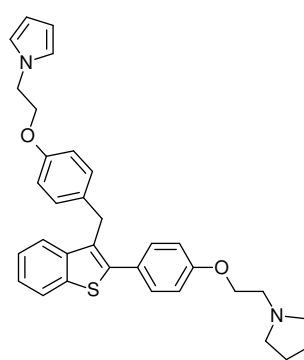

a3

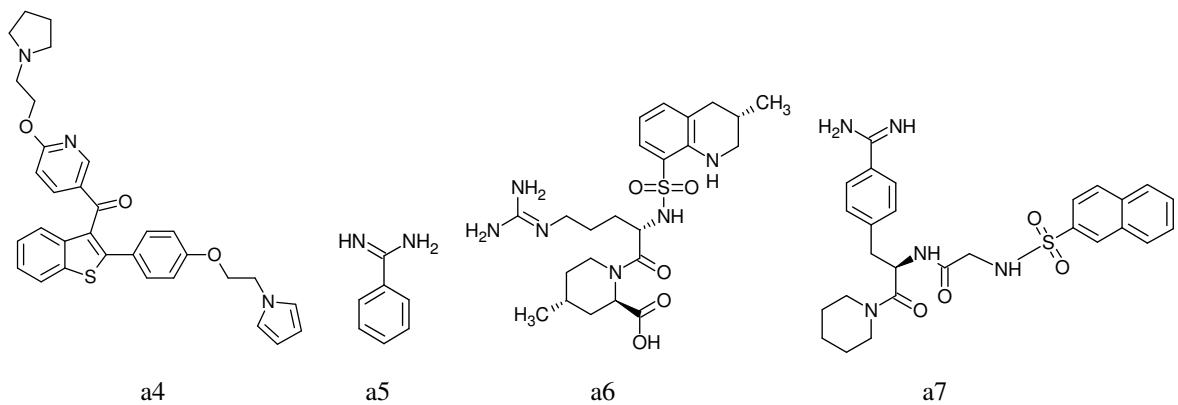

$\alpha$ -thrombin inhibitors

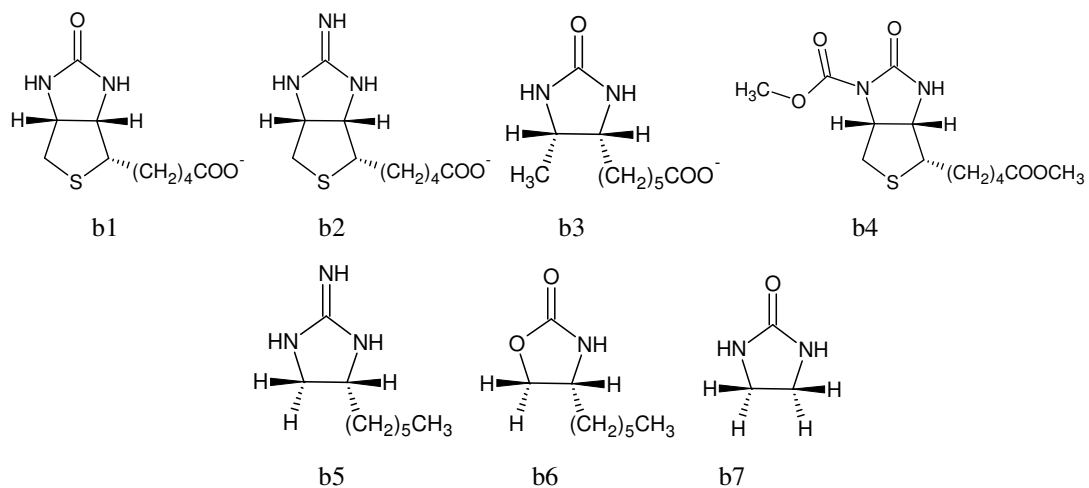

avidin inhibitors

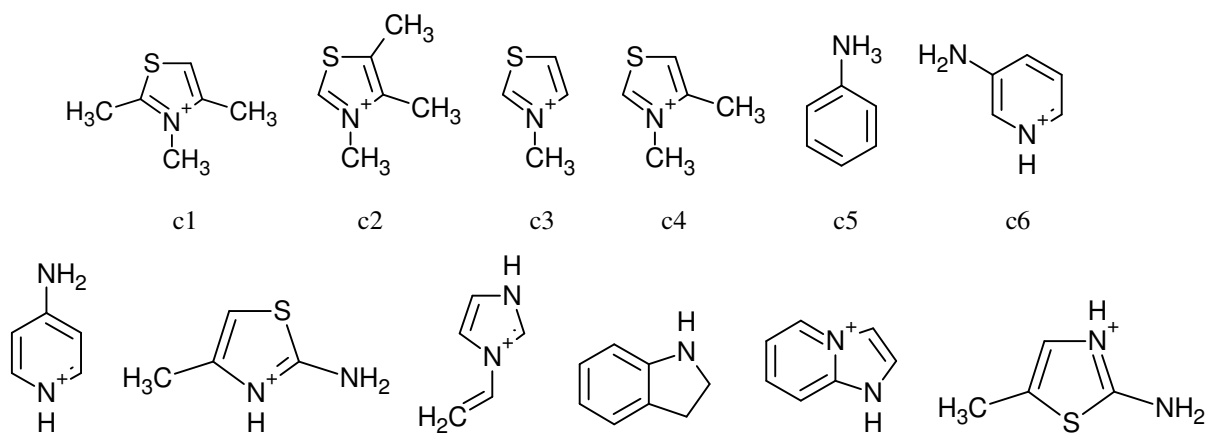

c7

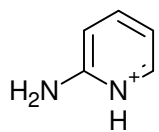

c13

c8

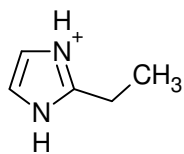

c14

c9

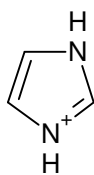

c15

c10

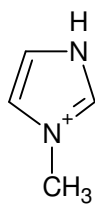

c16

c11

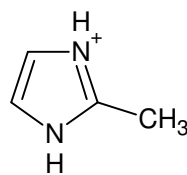

c17

c12

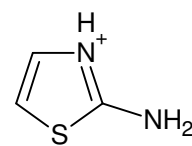

c18

### cytochrome C peroxidase inhibitors

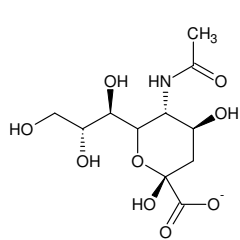

d1

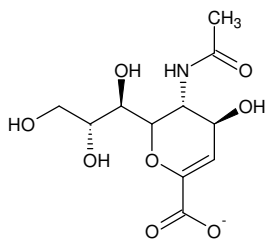

d2

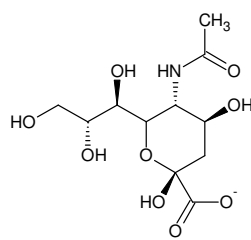

d3

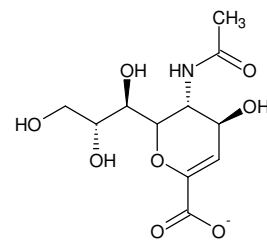

d4

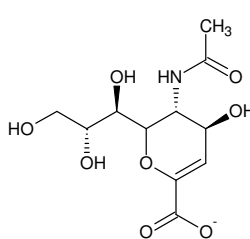

d5

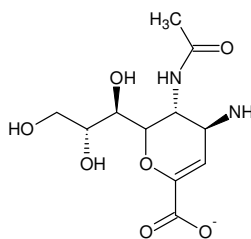

d6

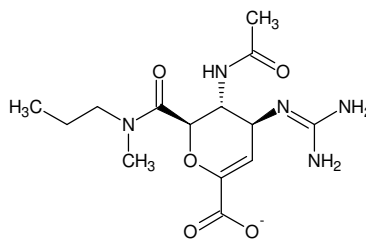

d7

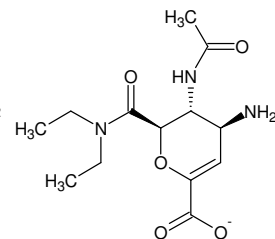

d8

### neuraminidase inhibitors

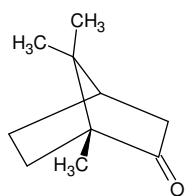

e1

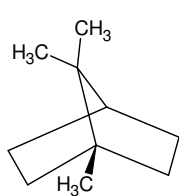

e2

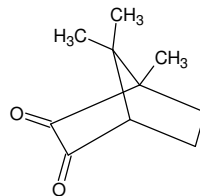

e3

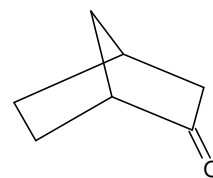

e4



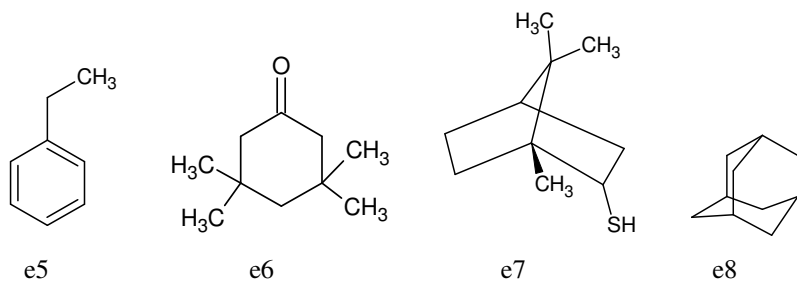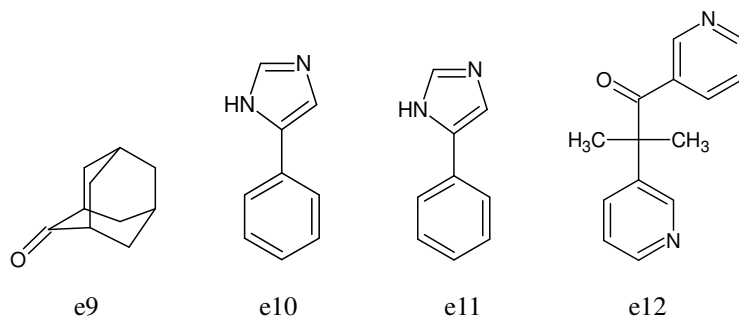

P450cam inhibitors

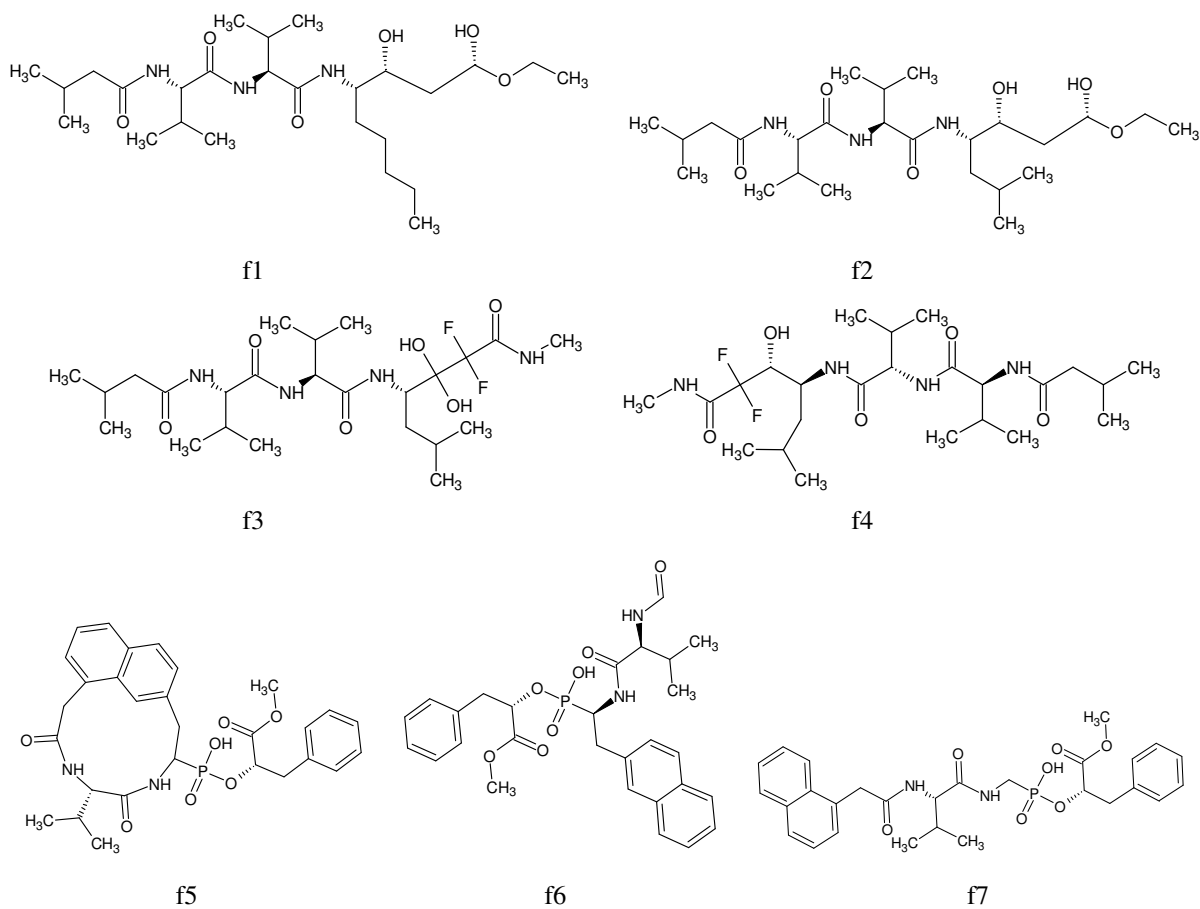

penicillopepsin inhibitors

**Figure S1.** Structures of the inhibitors studied: (a1~a7) al-thrombin inhibitors, (b1~b7) avidin inhibitors, (c1~c18) cytochrome C peroxidase inhibitors, (d1~d8) neuraminidase inhibitors, (e1~e12) P450cam inhibitors, (f1~f7) penicillopepsin inhibitors. The name of the inhibitors can be found in Table S1 in the supplementary materials.

## References

- (1) Chirgadze, N. Y.; Sall, D. J.; Briggs, S. L.; Clawson, D. K.; Zhang, M. et al. The crystal structures of human alpha-thrombin complexed with active site-directed diamino benzo[b]thiophene derivatives: A binding mode for a structurally novel class of inhibitors. *Protein Science* **2000**, *9*, 29-36.
- (2) Morris, G. M.; Goodsell, D. S.; Halliday, R. S.; Huey, R.; Hart, W. E. et al. Automated docking using a Lamarckian genetic algorithm and an empirical binding free energy function. *Journal of Computational Chemistry* **1998**, *19*, 1639-1662.
- (3) Banner, D. W.; Hadvary, P. Crystallographic Analysis at 3.0-Å Resolution of the Binding to Human Thrombin of 4 Active Site-Directed Inhibitors. *Journal of Biological Chemistry* **1991**, *266*, 20085-20093.
- (4) Brandstetter, H.; Turk, D.; Hoeffken, H. W.; Grosse, D.; Sturzebecher, J. et al. Refined 2.3-Ångstrom X-Ray Crystal-Structure of Bovine Thrombin Complexes Formed with the Benzamidine and Arginine-Based Thrombin Inhibitors Napap, 4-Tapap and Mqpa - a Starting Point for Improving Antithrombotics. *Journal of Molecular Biology* **1992**, *226*, 1085-1099.
- (5) Kuhn, B.; Kollman, P. A. Binding of a diverse set of ligands to avidin and streptavidin: An accurate quantitative prediction of their relative affinities by a combination of molecular mechanics and continuum solvent models. *Journal of Medicinal Chemistry* **2000**, *43*, 3786-3791.
- (6) Musah, R. A.; Jensen, G. M.; Bunte, S. W.; Rosenfeld, R. J.; Goodin, D. B. Artificial protein cavities as specific ligand-binding templates: Characterization of an engineered heterocyclic cation-binding site that preserves the evolved specificity of the parent protein. *Journal of Molecular Biology* **2002**, *315*, 845-857.
- (7) Eldridge, M. D.; Murray, C. W.; Auton, T. R.; Paolini, G. V.; Mee, R. P. Empirical scoring functions .1. The development of a fast empirical scoring function to estimate the binding affinity of ligands in receptor complexes. *Journal of Computer-Aided Molecular Design* **1997**, *11*, 425-445.
- (8) Baxter, C. A.; Murray, C. W.; Clark, D. E.; Westhead, D. R.; Eldridge, M. D. Flexible docking using Tabu search and an empirical estimate of binding affinity. *Proteins-Structure Function and Genetics* **1998**, *33*, 367-382.
- (9) Wang, R. X.; Lu, Y. P.; Wang, S. M. Comparative evaluation of 11 scoring functions for molecular docking. *Journal of Medicinal Chemistry* **2003**, *46*, 2287-2303.
- (10) Almlof, M.; Brandsdal, B. O.; Aqvist, J. Binding affinity prediction with different force fields: Examination of the linear interaction energy method. *Journal of Computational Chemistry* **2004**, *25*, 1242-1254.
- (11) Ishchenko, A. V.; Shakhnovich, E. I. Small molecule growth 2001 (SMoG2001): An improved knowledge-based scoring function for protein-ligand interactions. *Journal of Medicinal Chemistry* **2002**, *45*, 2770-2780.
- (12) James, M. N. G.; Sielecki, A. R.; Hayakawa, K.; Gelb, M. H. Crystallographic Analysis of Transition-State Mimics Bound to Penicillopepsin - Difluorostatine-Containing and Difluorostatone-Containing Peptides. *Biochemistry* **1992**, *31*, 3872-3886.
- (13) Jain, T.; Jayaram, B. An all atom energy based computational protocol for predicting binding affinities of protein-ligand complexes. *Febs Letters* **2005**, *579*, 6659-6666.
